# Supplementary material
Source: publisher site journal article supplement (https://www.dovepress.com/article/483689)
Supplement: Supplementary file 1 [file get_supplementary_file.php]

**Supplementary Material**

**Materials and Methods**

***Adiponectin levels in human bronchoalveolar lavage fluid***

Bronchiectasis patients who underwent bronchoscopy from March 2021 to March 2022 in the First Affiliated Hospital of Shandong First Medical University & Shandong Provincial Qianfoshan Hospital and Qilu Hospital of Shandong University were included. Inclusion criteria: (i) chest CT met the diagnostic criteria for bronchiectasis,1 (ii) aged 18-80 years, (iii) idiopathic or post-infection bronchiectasis, and (iv) no history of smoking. Exclusion criteria: (i) previous diagnosis of chronic obstructive pulmonary disease or asthma; (ii) immunodeficiency, primary ciliary dyskinesia syndrome, airway obstruction, allergic bronchopulmonary aspergillosis, or connective tissue disease; (iii) history of smoking; (iv) lung cancer or other malignancies; (v) ICU admission for mechanical ventilation; (vi) severe cardiac, hepatic or renal insufficiency; and (vii) glucocorticoid use in the last 4 weeks.

Patients without bronchiectasis on chest CT who underwent bronchoscopy at two hospitals during the same period were gender- and age-matched and included as the control group. Inclusion criteria: (i) underwent electronic bronchoscopy for unilateral peripheral pulmonary nodules (nodule diameter ≤3 cm) or (ii) underwent electronic bronchoscopy for hemoptysis (no significant abnormality detected by chest CT and pulmonary artery computed tomography arteriography). Exclusion criteria: (i) history of smoking; (ii) other abnormalities on chest CT, including pneumonia, interstitial pneumonia, multiple pulmonary nodules, or pleural effusion; (iii) lung cancer with lymph node metastasis or obstructive pneumonia; (iv) ICU admission for mechanical ventilation; (v) severe cardiopulmonary vascular disease; and (vi) connective tissue disease.

This study was approved by the First Affiliated Hospital of Shandong First Medical University & Shandong Provincial Qianfoshan Hospital ethics committee (2021-S402) and Qilu Hospital of Shandong University ethics committee (2019-147), and informed consent from the patients was obtained prior to isolation and use of these samples. Adiponectin levels in BALF were measured using the enzyme-linked immunosorbent assay (ELISA) method with the EK195 kit from MultiSciences, Hangzhou, China. Blank well and standard well with multiple dilutions were made as the control group.

***Immunohistochemistry of human lung tissue specimens***

Patients who underwent lobectomy for bronchiectasis, including bronchiectasis with recurrent refractory hemoptysis and limited bronchiectasis with chronic abscess formation, and were admitted to two hospitals (the First Affiliated Hospital of Shandong First Medical University & Shandong Provincial Qianfoshan Hospital and Qilu Hospital of Shandong University) from January 2021 to August 2022 were included; lung tissue specimens from bronchiectasis lesion sites were obtained. Inclusion criteria: CT of the chest met the diagnostic criteria of bronchiectasis,1 and pathological diagnosis of bronchiectasis was confirmed by pathologists. Exclusion criteria: pulmonary malignancy on pathologic examination and a history of smoking.

The control group included patients who were admitted to the thoracic surgery departments of both hospitals during the same period, were age- and gender-matched with the bronchiectasis group, and underwent lobectomy for isolated peripheral pulmonary nodules (≤3 cm in diameter); specimens were collected beyond 5 cm from the lung lesion. Inclusion criteria: surgical specimens with pathology of carcinoma *in situ* or microinvasive carcinoma, cancerous nodules of ≤3 cm maximum diameter, and absence of carcinoma at the cut edge, and no history of smoking.

Immunohistochemistry was performed on paraffin sections of human lung tissue specimens using adiponectin receptor 1 (AdipoR1, MA5-32249, Thermo Fisher Scientific, USA) and PPARγ (#2435, Cell Signaling Technology, USA), with phosphate buffer saline being the negative control.

***Experimental cell models***

**Human primary bronchial epithelial cells culture**

Normal human primary bronchial epithelial cells were acquired from patients who underwent bronchoscopy from December 2022 to September 2023 in the First Affiliated Hospital of Shandong First Medical University & Shandong Provincial Qianfoshan Hospital. Inclusion criteria: (i) underwent electronic bronchoscopy for unilateral peripheral pulmonary nodules (nodule diameter ≤3 cm) or (ii) underwent electronic bronchoscopy for hemoptysis (no significant abnormality detected by chest CT and pulmonary artery CTA). Exclusion criteria: (i) history of smoking; (ii) other abnormalities on chest CT, including pneumonia, interstitial pneumonia, multiple pulmonary nodules, or pleural effusion; (iii) lung cancer with lymph node metastasis or obstructive pneumonia; and (iv) severe cardiopulmonary vascular disease. This study was approved by the First Affiliated Hospital of Shandong First Medical University & Shandong Provincial Qianfoshan Hospital ethics committee (ethics review number: 2021-S402), and informed consent from the patients was obtained prior to isolation and use of these samples.

T-25 cm2 cell culture flask was collagen-coated by rat tail collagen type I (0.03 mg/mL). Electronic bronchoscopy was performed and 2 ~ 3 grade bronchial epithelium were gently removed with a sterile protective brush. Human primary bronchial epithelial cells were cultured in liquid phase after an electronic bronchoscope brush with PneumaCultTM-Ex medium (STEMCELL Technologies, Canada).The cells were observed to be distributed in clusters on the 5th day and the number of cells reached 80-90% confluence on the 10th day. Nest step was air-liquid interface culture of human primary bronchial epithelial cells. The logarithmic growth period cells were digested with 0.25% trypsin/EDTA digestion solution and cultured in the apical chamber of transwell (12 mm and 0.4 μm Pore Polyester Membrane Inserts, Corning, USA), with 1 mL of PneumaCultTM-Ex medium (STEMCELL Technologies, Canada) added to the basal chamber. After 2 ~ 4 days, the cell supernatant from the apical chamber was discarded, 1 mL of PneumaCultTM-ALI medium (STEMCELL Technologies, Canada) was added to the basal chamber, and cultured in air-liquid interface for 14 ~ 21 days.

**References**

1. Flume PA, Chalmers JD, Olivier KN. Advances in bronchiectasis: endotyping, genetics, microbiome, and disease heterogeneity. *Lancet Lond Engl.* 2018;392(10150):880–890.

Table S1 General information of donors for human primary bronchial epithelial cells

| Number | Age, years | Gender | Reasons for underwent bronchoscopy | Smoking History | Other significant abnormalities on chest CT | Results of pathological cytology and microbiology of protective brush |
| --- | --- | --- | --- | --- | --- | --- |
| 1 | 55 | Male | unilateral peripheral pulmonary nodules (nodule diameter ≤3 cm) | No | None | Negative |
| 2 | 51 | Female | hemoptysis | No | None | Negative |
| 3 | 47 | Male | hemoptysis | No | None | Negative |
| 4 | 65 | Male | unilateral peripheral pulmonary nodules (nodule diameter ≤3 cm) | No | None | Negative |
| 5 | 58 | Male | hemoptysis | No | None | Negative |
| 6 | 58 | Male | unilateral peripheral pulmonary nodules (nodule diameter ≤3 cm) | No | None | Negative |
| 7 | 62 | Male | unilateral peripheral pulmonary nodules (nodule diameter ≤3 cm) | No | None | Negative |
| 8 | 49 | Female | unilateral peripheral pulmonary nodules (nodule diameter ≤3 cm) | No | None | Negative |
| 9 | 53 | Female | unilateral peripheral pulmonary nodules (nodule diameter ≤3 cm) | No | None | Negative |
| 10 | 50 | Male | unilateral peripheral pulmonary nodules (nodule diameter ≤3 cm) | No | None | Negative |
| 11 | 49 | Female | unilateral peripheral pulmonary nodules (nodule diameter ≤3 cm) | No | None | Negative |
| 12 | 62 | Female | unilateral peripheral pulmonary nodules (nodule diameter ≤3 cm) | No | None | Negative |
